# Supplementary material
Source: PubMed Central journal article supplement (PMC6666414)
Supplement: NIHMS1523927-supplement-3.pdf [file NIHMS1523927-supplement-3.pdf]

**Table S1.** Annotated survival and cause of death data for every mouse analyzed

| Mouse ID | Treatment | RT Dose Received (Gy) | Survival from diagnosis (days) | Cause of death | Trigger for Euthanasia | Notes on Cause of Death                                                                      |
|----------|-----------|-----------------------|--------------------------------|----------------|------------------------|----------------------------------------------------------------------------------------------|
| VE01     | VEH       | 0                     | 9                              | local          | Mouse Moribund         | Massive obstructing head tumor with duodenal and liver invasion with jaundice                |
| VE02     | VEH       | 0                     | 1                              | local          | Mouse Moribund         | Local extension into liver causing obstruction                                               |
| VE03     | VEH       | 0                     | 7                              | local          | Mouse Moribund         | Local extension into liver causing obstruction with jaundice                                 |
| VE04     | VEH       | 0                     | 21                             | metastatic     | Mouse Moribund         | Five large embolic lung mets                                                                 |
| VE05     | VEH       | 0                     | 9                              | local          | Mouse Moribund         | hepatic invasion causing ascites, jaundice                                                   |
| VE06     | VEH       | 0                     | 1                              | metastatic     | Mouse Moribund         | Widespread mets including CNS                                                                |
| VE07     | VEH       | 0                     | 1                              | metastatic     | Mouse Moribund         | Mets to gall bladder, liver and lung, jaundice                                               |
| VE08     | VEH       | 0                     | 7                              | metastatic     | Mouse Moribund         | Peritoneal carcinomatosis, lung mets                                                         |
| VE09     | VEH       | 0                     | 27                             | unknown        | Found dead             | unknown, mouse found dead                                                                    |
| VE10     | VEH       | 0                     | 10                             | unknown        | Found dead             | unknown, mouse found dead                                                                    |
| VE11     | VEH       | 0                     | 39                             | metastatic     | Mouse Moribund         | carcinomatosis with kidney encasement                                                        |
| VE12     | VEH       | 0                     | 21                             | local          | Mouse Moribund         | Obstruction of duodenal bulb                                                                 |
| VE13     | VEH       | 0                     | 37                             | local          | Tumor size             | 18mm multicentric tumor obstructing invading into duodenum                                   |
| VE14     | VEH       | 0                     | 7                              | local          | Mouse Moribund         | Invasion into stomach causing obstruction with ascites                                       |
| VE15     | VEH       | 0                     | 7                              | local          | Mouse Moribund         | Hepatic invasion and bile duct obstruction, jaundice                                         |
| VE16     | VEH       | 0                     | 6                              | local          | Mouse Moribund         | Jejunal invasion causing obstruction                                                         |
| VE17     | VEH       | 0                     | 6                              | local          | Mouse Moribund         | Local hepatic invasion causing ascites and jaundice                                          |
| VE18     | VEH       | 0                     | 3                              | local          | Mouse Moribund         | Duodenum obstruction, met in the muscle wall                                                 |
| VE19     | VEH       | 0                     | 0                              | local          | Mouse Moribund         | Local invasion into liver with bile duct obstruction, jaundice                               |
| VE20     | VEH       | 0                     | 17                             | local          | Tumor size             | Massive obstructing tail tumor, invading stomach and jejunum                                 |
| VE21     | VEH       | 0                     | 30                             | local          | Mouse Moribund         | Large tumor without evidence of mets                                                         |
| VE22     | VEH       | 0                     | 9                              | local          | Mouse Moribund         | Large tumor without evidence of mets                                                         |
| VE23     | VEH       | 0                     | 14                             | local          | Tumor size             | Two large body tumors combined width of 23 mm, euthanasia due to tumor size and local spread |
| VE24     | VEH       | 0                     | 22                             | local          | Tumor size             | Invasion into duodenum by massive obstructing head tumor                                     |
| VE25     | VEH       | 0                     | 15                             | local          | Mouse Moribund         | Gastric invasion by massive tail tumor                                                       |
| VE26     | VEH       | 0                     | 15                             | local          | Tumor size             | 21mm tumor in pancreatic tail                                                                |
| VE27     | VEH       | 0                     | 36                             | local          | Mouse Moribund         | Obstructing body tumor with gastric outlet obstruction                                       |
| VE28     | VEH       | 0                     | 1                              | local          | Tumor size             | Local extension into liver hilum causing jaundice                                            |
| FG01     | FG-4592   | 0                     | 13                             | local          | Tumor size             | Massive obstructing body tumor                                                               |

**Table S1.** Annotated survival and cause of death data for every mouse analyzed

|       |          |    |     |            |                |                                                                          |
|-------|----------|----|-----|------------|----------------|--------------------------------------------------------------------------|
| FG02  | FG-4592  | 0  | 100 | metastatic | Mouse Moribund | Widespread metastases                                                    |
| FG03  | FG-4592  | 0  | 50  | local      | Mouse Moribund | Large tumor of pancreatic body with obstruction of duodenum and jaundice |
| FG04  | FG-4592  | 0  | 24  | local      | Mouse Moribund | Massive obstructing body tumor                                           |
| FG05  | FG-4592  | 0  | 23  | metastatic | Mouse Moribund | Widespread metastases                                                    |
| FG06  | FG-4592  | 0  | 29  | local      | Mouse Moribund | Large obstructing body tumor with Gi invasion                            |
| FG07  | FG-4592  | 0  | 44  | metastatic | Mouse Moribund | Carcinomatosis, with lung mets                                           |
| FG08  | FG-4592  | 0  | 13  | metastatic | Mouse Moribund | Carcinomatosis, with lung mets                                           |
| FG09  | FG-4592  | 0  | 15  | local      | Mouse Moribund | Duodenal and gastric invasion with complete obstruction                  |
| FG10  | FG-4592  | 0  | 56  | metastatic | Mouse Moribund | Carcinomatosis with kidneys and pancreas involved                        |
| FG11  | FG-4592  | 0  | 30  | local      | Mouse Moribund | Complete duodenal obstruction and hepatic invasion with jaundice         |
| VRT01 | VEH + RT | 10 | 7   | local      | Tumor size     | Massive obstructing head tumor with 80-90% obstruction                   |
| VRT02 | VEH + RT | 10 | 5   | local      | Mouse Moribund | Internal peritoneal bleeding from tumor invading nearby blood vessel     |
| VRT03 | VEH + RT | 35 | 16  | local      | Mouse Moribund | Large tumor obstructing duodenal bulb, with two small liver mets         |
| VRT04 | VEH + RT | 50 | 42  | local      | Mouse Moribund | Tumor obstructing gastric antrum                                         |
| VRT05 | VEH + RT | 70 | 23  | metastatic | Mouse Moribund | Carcinomatosis with renal mets causing hydronephrosis                    |
| VRT06 | VEH + RT | 70 | 24  | metastatic | Mouse Moribund | Embolic lung mets and a secondary tail tumor likely outside of RT field  |
| VRT07 | VEH + RT | 75 | 27  | RT TOX     | Mouse Moribund | Widespread intraluminal hemorrhage observed                              |
| VRT08 | VEH + RT | 75 | 37  | RT TOX     | Mouse Moribund | Radiation enteritis with luminal bleeding observed                       |
| VRT09 | VEH + RT | 75 | 41  | metastatic | Mouse Moribund | Several large central lung mets                                          |
| VRT10 | VEH + RT | 75 | 36  | RT TOX     | Mouse Moribund | Intestinal edema and intraluminal bleeding                               |
| VRT11 | VEH + RT | 75 | 26  | RT TOX     | Mouse Moribund | Moribund, with GI Bleeding observed                                      |
| VRT12 | VEH + RT | 75 | 40  | local      | Mouse Moribund | Obstructing tail tumor with gastric antrum invasion                      |
| VRT13 | VEH + RT | 75 | 37  | RT TOX     | Mouse Moribund | GI bleeding throughout small intestines, incidental thymus met           |
| FRT01 | FG + RT  | 10 | 8   | metastatic | Mouse Moribund | Embolic lung mets                                                        |
| FRT02 | FG + RT  | 15 | 9   | local      | Mouse Moribund | Duodenal obstruction, no other mets                                      |
| FRT03 | FG + RT  | 25 | 13  | local      | Mouse Moribund | Duodenal obstruction, no other mets                                      |
| FRT04 | FG + RT  | 25 | 12  | local      | Mouse Moribund | Gastric outlet obstruction, no other mets                                |
| FRT05 | FG + RT  | 35 | 15  | metastatic | Mouse Moribund | Widespread metastases: lung, liver and intrapancreatic mets              |
| FRT06 | FG + RT  | 45 | 15  | local      | Tumor Size     | Tumor 17mm in size directly in-field meeting size criteria               |
| FRT07 | FG + RT  | 50 | 17  | metastatic | Mouse Moribund | Widespread metastases, including lung and liver mets                     |
| FRT08 | FG + RT  | 60 | 22  | metastatic | Mouse Moribund | Diffuse peritoneal carcinomatosis without obstruction                    |

**Table S1.** Annotated survival and cause of death data for every mouse analyzed

|       |         |    |    |            |                |                                                                                                             |
|-------|---------|----|----|------------|----------------|-------------------------------------------------------------------------------------------------------------|
| FRT09 | FG + RT | 60 | 19 | local      | Mouse Moribund | Duodenal obstruction no other mets                                                                          |
| FRT10 | FG + RT | 65 | 23 | local      | Mouse Moribund | Gastric obstruction due to antral invasion, no other mets                                                   |
| FRT11 | FG + RT | 75 | 49 | metastatic | Mouse Moribund | Peritoneal carcinomatosis causing hydronephrosis                                                            |
| FRT12 | FG + RT | 75 | 43 | metastatic | Mouse Moribund | Large embolic lung mets                                                                                     |
| FRT13 | FG + RT | 75 | 50 | metastatic | Mouse Moribund | Widespread peritoneal carcinomatosis involving the kidneys and liver.<br>Solitary brain metastasis observed |
| FRT14 | FG + RT | 75 | 69 | local      | Mouse Moribund | Duodenal obstruction due to tumor progression. No GI bleeding                                               |
| FRT15 | FG + RT | 75 | 42 | metastatic | Mouse Moribund | No macromets, No GI bleed, Significant microscopic disease scattered throughout the lung and liver          |
| FRT16 | FG + RT | 75 | 37 | local      | Tumor size     | Duodenal invasion with severe obstruction (no digested matter or fecal matter), 4 small liver mets          |
| FRT17 | FG + RT | 75 | 34 | metastatic | Mouse Moribund | Carcinomatosis with probable malignant ascites, including implants on liver and pancreas                    |
| FRT18 | FG + RT | 75 | 45 | local      | Tumor size     | Duodenal obstruction, growth directly in the RT field                                                       |
